# Supplementary material for: Genetic load in marine animals: a review
Source: PubMed Central journal article supplement — Curr Zool. 2016 Sep 23;62(6):567–79. doi: 10.1093/cz/zow096 (PMC5804265; doi:10.1093/cz/zow096), 2016-09-23
Supplement: zow096_supp.pdf [file zow096_supp.pdf]

## Supplementary Materials

**Table S1.** Details of the lethal equivalent estimates for marine animals from Figure 1.<sup>a</sup>Lethal equivalents in a haploid genome estimated from *B*, the rate of decline in fitness with inbreeding or from molecular marker data. <sup>b</sup>Lethal equivalent estimates from molecular marker data (haploid). Estimates from Launey and Hedgecock 2001 are from four different lines, while estimates from Plough and Hedgecock 2011 are from 2 different inbred families. See File S1 for full citation information.

| Group         | Species           | Inbreeding     | Trait              | LE <sup>a</sup>   | Citation                    |
|---------------|-------------------|----------------|--------------------|-------------------|-----------------------------|
| <i>Invert</i> | Purple sea urchin | 0, 0.25        | larval growth      | 1.32              | Anderson and Hedgecock 2010 |
|               | Catarina scallop  | 0, 0.25        | larval survival    | 1.06              | Ibarra et al., 1995         |
|               | Pacific abalone   | 0, 0.25        | post set survival  | 2.53              | Kobiashi and Kijima 2010    |
|               | Pacific abalone   | 0, 0.25        | % metamorphosis    | 1.15              | Deng et al., 2005           |
|               | White shrimp      | 0, 0.25, 0.375 | hatch rate         | 1.68              | Moss et al., 2009           |
|               | White shrimp      | 0, 0.25, 0.375 | hatchery survival  | 1.38              | Moss et al., 2009           |
|               | Eastern oyster    | 0, 0.25        | larval survival    | 0                 | Mallet and Haley 1983       |
|               | Eastern oyster    | 0, 0.25        | survival to day 2  | 6.08              | Longwell and Stiles 1973    |
|               | Pacific oyster    | 0.25           | viability          | 3.77 <sup>b</sup> | Launey and Hedgecock 2001   |
|               | Pacific oyster    | 0.25           | viability          | 2.27 <sup>b</sup> | Launey and Hedgecock 2001   |
|               | Pacific oyster    | 0.25           | viability          | 4.03 <sup>b</sup> | Launey and Hedgecock 2001   |
|               | Pacific oyster    | 0.25           | viability          | 3.77 <sup>b</sup> | Launey and Hedgecock 2001   |
|               | Pacific oyster    | 0.25           | viability          | 3.02 <sup>b</sup> | Plough and Hedgecock 2011   |
|               | Pacific oyster    | 0.25           | viability          | 2.67 <sup>b</sup> | Plough and Hedgecock 2011   |
| <i>Fish</i>   | Atlantic Cod      | 0, 0.25        | hatch survival     | 0.94              | Puckrin 2015                |
|               | Rainbow trout     | 0, 0.25, 0.5   | fry survival       | 0.08              | Kincaid 1983                |
|               | Steelhead Salmon  | 0, 0.25        | 0–3 month survival | 0.2               | Thrower and Hard 2009       |

---

**File S1. List of references used to generate LE estimates for marine animals in table S1**

- Anderson D, Hedgecock D, 2010. Inbreeding depression and growth heterosis in larvae of the purple sea urchin *Strongylocentrotus purpuratus* (Stimpson). *J. Exp. Mar. Biol. Ecol.* 384: 68–75.
- Deng YW, Liu X, Zhang GF, Guo XM, 2005. Inbreeding depression and maternal effects on early performance of Pacific abalone. *N. Am. J. Aquacult.* 67: 231–236.
- Ibarra AM, Cruz P, Romero BA, 1995. Effects of inbreeding on growth and survival of self-fertilized Catarina scallop larvae *Argopecten circularis*. *Aquaculture* 134: 37–47.
- Kobayashi T, Kijima A, 2010. Effects of inbreeding depression in Pacific abalone *Haliotis discus hannai*. *J. Shellfish Res.* 29: 643–649.
- Kincaid HL, 1983. Inbreeding in fish populations used for aquaculture. *Aquaculture* 33: 215–227.
- Launey S, Hedgecock D, 2001. High genetic load in the Pacific oyster *Crassostrea gigas*. *Genetics* 159: 255–265.
- Longwell AC, Stiles SS, 1973. Gamete cross incompatibility and inbreeding in the commercial American oyster *Crassostrea virginica* Gmelin. *Cytologia* (Tokyo) 38: 521.
- Mallet AL, Haley LE, 1983. Effects of inbreeding on larval and spat performance in the American oyster. *Aquaculture* 38: 521–533.
- Moss DR, Arce SM, Otsu CA, Moss SM, 2008. Inbreeding effects on hatchery and growout performance of Pacific white shrimp *Penaeus (Litopenaeus) vannamei*. *J. World Aquacult. Soc.* 39: 467–476.
- Plough LV, Hedgecock D, 2011. Quantitative trait locus analysis of stage-specific inbreeding depression in the Pacific oyster *Crassostrea gigas*. *Genetics* 189: 1473–1486.
- Puckrin OA, 2015. *Incidence of Sib Mating, Test for Inbreeding Depression and Potential Application for Reducing the Impact of Escaped Cultivated Cod on Wild Atlantic Cod Gadus morhua*. Masters thesis, Department of Biology Memorial University of Newfoundland.
- Thrower FP, Hard JJ, 2009. Effects of a single event of close inbreeding on growth and survival in steelhead. *Conserv. Genet.* 10: 1299–130

**Table S2.** Summary of segregation distortion studies in wild crosses of marine animals

| Author                | Species                  | Taxa group | Segregation Distortion | Proportion of Markers | Marker type                               | Comments                                        |
|-----------------------|--------------------------|------------|------------------------|-----------------------|-------------------------------------------|-------------------------------------------------|
| Wang et al. 2007a     | Bay scallop              | bivalve    | yes                    | 0.19                  | μsats <sup>1</sup> and AFLPs <sup>2</sup> |                                                 |
| Wang et al. 2012      | Bay scallop              | bivalve    | yes                    | 0.60                  | μsats                                     | No linkage map                                  |
| Qin et al. 2007       | Bay scallop              | bivalve    | yes                    | 0.14                  | μsats and AFLPs                           | Clustered across three linkage groups           |
| Lallias et al. 2007b  | Blue mussel              | bivalve    | yes                    | 0.28                  | AFLPs                                     |                                                 |
| Yu and Guo 2003       | Eastern oyster           | bivalve    | yes                    | 0.08                  | μsats and AFLPs                           |                                                 |
| Lallias et al. 2007a  | Flat oyster              | bivalve    | yes                    | 0.33                  | AFLPs                                     |                                                 |
| Peterson et al. 2012  | Pacific lion-paw scallop | bivalve    | yes                    | 0.07                  | μsats and AFLPs                           |                                                 |
| Yuan et al. 2010      | Noble scallop            | bivalve    | yes                    | 0.11                  | μsats and AFLPs                           |                                                 |
| Hedgecock et al. 2015 | Pacific oyster           | bivalve    | yes                    | 0.49                  | μsats and SNPs <sup>3</sup>               |                                                 |
| Li and Guo 2004       | Pacific oyster           | bivalve    | yes                    | 0.27                  | AFLPs                                     |                                                 |
| Plough et al. 2016    | Pacific oyster           | bivalve    | yes                    | 0.56                  | μsats and SNPs                            |                                                 |
| Bai et al. 2015       | Pearl mussel             | bivalve    | yes                    | 0.20                  | μsats                                     |                                                 |
| Jones et al. 2013     | Pearl oyster             | bivalve    | yes                    | 0.14                  | SNPs                                      | 121/877 SNPs across 16 families - FDR corrected |
| Li and He 2014        | Pearl oyster             | bivalve    | yes                    | 0.31                  | RADseq <sup>4</sup>                       |                                                 |
| Shi et al. 2009       | Pearl oyster             | bivalve    | yes                    | 0.13                  | μsats and AFLPs                           |                                                 |
| Xu et al. 2008        | Yellow scallop           | bivalve    | yes                    | 0.08                  | μsats and AFLPs                           |                                                 |
| Wang et al. 2003      | Zhikong scallop          | bivalve    | yes                    | 0.35                  | AFLPs                                     |                                                 |
| Wang et al. 2005      | Zhikong scallop          | bivalve    | yes                    | 0.06                  | AFLPs                                     |                                                 |
| Zhan et al. 2009      | Zhikong scallop          | bivalve    | yes                    | 0.30                  | μsats                                     |                                                 |
| Nossa et al. 2014     | Horseshoe crab           | crustacean | not reported           | NA                    | Whole genome SNPs                         | Tested, but results not reported                |
| Cui et al. 2015       | Mitten crab              | crustacean | culled/not reported    | NA                    | RADseq                                    |                                                 |
| Liu et al. 2012b      | Swimming crab            | crustacean | yes                    | 0.10                  | μsats                                     |                                                 |
| Baranski et al. 2014  | Tiger shrimp             | crustacean | yes                    | 0.07                  | SNPs                                      |                                                 |
| Staelens et al. 2008  | Tiger shrimp             | crustacean | yes                    | 0.21                  | AFLPs                                     | Averaged across three families                  |
| You et al. 2010       | Tiger shrimp             | crustacean | yes                    | 0.14                  | μsats and AFLPs                           | 28/85 aflp, 19/256 μsats                        |

PLOUGH: Genetic load in marine animals

| Author                      | Species            | Taxa group | Segregation Distortion | Proportion of Markers | Marker type     | Comments                                                             |
|-----------------------------|--------------------|------------|------------------------|-----------------------|-----------------|----------------------------------------------------------------------|
| Du et al. 2010              | White Shrimp       | crustacean | not reported           | NA                    | SNPs            | apparently tested but not reported                                   |
| Zhang et al. 2007           | White shrimp       | crustacean | yes                    | 0.39                  | μsats and AFLPs |                                                                      |
| Tian et al. 2015            | Sea cucumber       | echinoderm | not reported           | NA                    | RADseq          | Filtering for % geno and Mendel: SNP # reduced from 32,000 to 11,000 |
| Yan et al. 2013             | Sea cucumber       | echinoderm | yes                    | 0.22                  | μsats and SNPs  |                                                                      |
| Wang et al. 2007b           | Asian seabass      | fish       | yes                    | 0.11                  | μsats           | Clustered on 3 lgs.                                                  |
| Wang et al. 2015a           | Asian seabass      | fish       | yes                    | 0.15                  | RADseq          | removed, culled before mapping                                       |
| Hubert et al. 2010          | Atlantic cod       | fish       | low                    | 0.03                  | SNPs            |                                                                      |
| Reid et al. 2007            | Atlantic halibut   | fish       | low                    | 0.02                  | μsats and AFLPs |                                                                      |
| Gonen et al. 2014           | Atlantic salmon    | fish       | not reported           | NA                    | RADseq          |                                                                      |
| Wang et al. 2010            | Blue gill sunfish  | fish       | yes                    | 0.02                  | AFLPs           |                                                                      |
| Hermida et al. 2014         | Brill              | fish       | yes                    | 0.18                  | μsats           |                                                                      |
| Li et al. 2014              | Channel catfish    | fish       | not reported           | NA                    | SNPs            |                                                                      |
| Lui et al. 2003             | Channel catfish    | fish       | yes                    | 0.17                  | AFLPs           |                                                                      |
| Christiakov et al. 2005     | European seabass   | fish       | not reported           | NA                    | μsats           |                                                                      |
| Palaiokostas et al. 2015    | European seabass   | fish       | not reported           | NA                    | RADseq          |                                                                      |
| Kai et al. 2005             | Fugu               | fish       | not reported           | NA                    | μsats           |                                                                      |
| Tsigenopoulos et al. 2014   | Gilthead sea bream | fish       | not reported           | NA                    | μsats and SNPs  | Not reported, likely culled by Crimap                                |
| Kai et al. 2014             | Japanese eel       | fish       | low                    | 0.01                  | RADseq          |                                                                      |
| Nomura et al. 2011          | Japanese eel       | fish       | low                    | 0.05                  | μsats and AFLPs |                                                                      |
| Castano-Sanchez et al. 2010 | Japanese flounder  | fish       | not reported           | NA                    | μsats and SNPs  |                                                                      |
| Coimbra et al. 2003         | Japanese flounder  | fish       | not reported           | NA                    | μsats and AFLPs |                                                                      |
| Song et al. 2012b           | Japanese flounder  | fish       | yes                    | 0.38                  | μsats           |                                                                      |
| Kessuwan et al. 2016        | Kelp grouper       | fish       | not reported           | NA                    | μsats           | not reported, but apparently tested                                  |
| Liu et al. 2013             | Kelp grouper       | fish       | not reported           | NA                    | μsats           |                                                                      |

PLOUGH: Genetic load in marine animals

| Author                 | Species                 | Taxa group | Segregation Distortion | Proportion of Markers | Marker type                      | Comments                                                                          |
|------------------------|-------------------------|------------|------------------------|-----------------------|----------------------------------|-----------------------------------------------------------------------------------|
| Naruse et al. 2000     | Medaka                  | fish       | not reported           | NA                    | μsats, AFLPs, RAPDs <sup>5</sup> |                                                                                   |
| You et al. 2013        | Orange spotted grouper  | fish       | yes                    | 0.30                  | MSG <sup>6</sup>                 | Could be other artifacts (nulls, non-Mendelian segregation)                       |
| Hollenbeck et al. 2015 | Red drum                | fish       | low                    | ~0.00                 | μsats                            |                                                                                   |
| Diopere et al. 2014    | Common sole             | fish       | yes                    | 0.04                  | μsats and SNPs                   |                                                                                   |
| Liao et al. 2009       | Half-smooth sole        | fish       | yes                    | 0.33                  | μsats and AFLPs                  |                                                                                   |
| Song et al. 2012a      | Half-Smooth sole        | fish       | yes                    | 0.31                  | μsats                            |                                                                                   |
| Amores et al. 2011     | Spotted gar             | fish       | not reported           | NA                    | RADseq                           |                                                                                   |
| Liu et al. 2012a       | Striped bass            | fish       | not reported           | NA                    | μsats                            |                                                                                   |
| Piechel et al. 2001    | three-spine stickleback | fish       | not reported           | NA                    | μsats                            |                                                                                   |
| Bouza et al. 2007      | Turbot                  | fish       | yes                    | 0.10                  | μsats                            | Reported as "scattered"                                                           |
| Bouza et al. 2012      | Turbot                  | fish       | yes                    | 0.27                  | μsats and SNPs                   |                                                                                   |
| Wang et al. 2015b      | Turbot                  | fish       | culled/not reported    | NA                    | RADseq                           |                                                                                   |
| Dor et al. 2014        | White grouper           | fish       | low                    | 0.02                  | μsats                            | Reported at $\alpha = 0.01$ level                                                 |
| Ao et al. 2015         | Yellow croaker          | fish       | culled/not reported    | NA                    | RADseq                           | From 30K to 10K snps that fit Mendel                                              |
| Ning et al. 2007       | Yellow croaker          | fish       | yes                    | 0.33                  | μsats and AFLPs                  |                                                                                   |
| Xiao et al. 2015       | Yellow croaker          | fish       | not reported           | NA                    | Transcriptome SNPs               | 23,000 to 8,300 SNPs passing test for Mendel?                                     |
| Aoki et al. 2015       | Yellowtail              | fish       | not reported           | NA                    | SNPs                             | not reported, but they tested for chi-square                                      |
| Portnoy et al. 2010    | Red drum                | fish       | low                    | 0.04                  | μsats                            | Only Bonferroni corrected reported; distortions clustered on a few linkage groups |
| Liu et al. 2006        | Pacific abalone         | gastropod  | low                    | 0.05                  | μsats, AFLPs, RAPDs              | Only Bonferroni corrected reported                                                |

Web of Science (WOS) search was performed for articles with titles containing words about segregation/linkage (any of the following key words; linkage map\*, genetic map\*, QTL, QTL-map\*, segregation, segregation distortion, transmission ratio distortion) and marine animal groups (any key words; \*fish, fish\*, shellfish, oyster, mussel, mollus\*, shrimp, crab, decapod, clam, crustacean, scallop, hexapod, lobster, marine, ocean, sea\*, barnacle, copepod, \*bass, urchin, snail, echinoderm), where 'word\*' denotes a match of the proceeding word and any length string of any characters after it. Studies that used specific common or scientific names (e.g. Halibut or Salmo) were not identified with this search but were retrieved manually with more specific searches (see text for detail). Up to three data points per species were included and only outbred F<sub>1</sub> segregation data was considered. <sup>1</sup>microsatellite markers; <sup>2</sup>amplified fragment length polymorphisms; <sup>3</sup>single nucleotide polymorphisms; <sup>4</sup>restriction digest associated DNA markers; <sup>5</sup>multiplexed shotgun sequencing; <sup>6</sup>random amplified DNA polymorphisms.

**File S2. List of references used in literature survey of segregation distortion**

- Amores A, Catchen J, Ferrara A, Fontenot Q, Postlethwait JH, 2011. Genome evolution and meiotic maps by massively parallel DNA sequencing: spotted gar, an outgroup for the teleost genome duplication. *Genetics* 188: 799–808.
- Ao J, Li J, You X, Mu Y, Ding Y et al., 2016. Construction of the high-density genetic linkage map and chromosome map of large yellow croaker *Larimichthys crocea*. *Int. J. Mol. Sci* 16: 26237–48
- Aoki J-Y, Kai W, Kawabata Y, Ozaki A, Yoshida K et al., 2015. Second generation physical and linkage maps of yellowtail *Seriola quinqueradiata* and comparison of synteny with four model fish. *BMC Genomics* 16: 406.
- Bai Z, Han X, Luo M, Lin J, Wang G et al., 2015. Constructing a microsatellite-based linkage map and identifying QTL for pearl quality traits in triangle pearl mussel *Hyriopsis cumingii*. *Aquaculture* 437: 102–110.
- Baranski M, Gopikrishna G, Robinson NA, Katneni VK, Shekhar MS et al., 2014. The development of a high density linkage map for black tiger shrimp *Penaeus monodon* based on cSNPs. *PLoS ONE* 9: e85413.
- Bouza C, Hermida M, Pardo BG, Fernández C, Fortes GG et al., 2007. A microsatellite genetic map of the turbot *Scophthalmus maximus*. *Genetics* 177: 2457–2467.
- Bouza C, Hermida M, Pardo BG, Vera M, Fernández C et al., 2012. An expressed sequence tag (EST)-enriched genetic map of turbot *Scophthalmus maximus*: a useful framework for comparative genomics across model and farmed teleosts. *BMC Genet.* 13: 54.
- Castano-Sanche C, Fuji K, Ozaki A, Hasegawa O, Sakamoto T et al., 2007. High-density linkage map of the Japanese flounder *Paralichthys olivaceus*. *Aquaculture* 272: S248-S248.
- Chistiakov D, Hellemans B, Haley CS, Law AS, Tsigenopoulos CS et al., 2005. Microsatellite linkage map of the European sea bass *Dicentrarchus labrax*. *Genetics* 170 1821–1826
- Coimbra MRM, Kobayashi K, Koretsugu S, Hasegawa O, Ohara E et al., 2003. A genetic linkage map of the Japanese flounder *Paralichthys olivaceus*. *Aquaculture* 220: 203–218.
- Cui Z, Hui M, Liu Y, Song C, Li X et al., 2015. High-density linkage mapping aided by transcriptomics documents ZW sex determination system in the Chinese mitten crab *Eriocheir sinensis*. *Heredity* 115: 206–215.
- Diopere E, Maes GE, Komen H, Volckaert FAM, Groenen MAM, 2014. A genetic linkage map of sole *Solea solea*: a tool for evolutionary and comparative analyses of exploited (flat) fishes. *PLoS ONE* 9: e115040.
- Dor L, Shirak A, Gorshkov S, Band MR, Korol A et al., 2014. Construction of a microsatellites-based linkage map for the white grouper *Epinephelus aeneus*. *G3 (Bethesda)* 4: 1455–1464.
- Du ZQ, Ciobanu DC, Onteru SK, Gorbach D, Mileham AJ et al., 2010. A gene-based SNP linkage map for pacific white shrimp *Litopenaeus vannamei*. *Anim. Genet.* 41: 286–294.
- Gonen S, Lowe N, Cezard T, Gharbi K, Bishop S et al., 2014. Linkage maps of the Atlantic salmon *Salmo salar* genome derived from RAD sequencing. *BMC Genomics* 15: 166
- Hedgecock D, Shin G, Gracey AY, Van Den Berg D, Samanta MP, 2015. Second-generation linkage maps for the Pacific oyster *Crassostrea gigas* reveal errors in assembly of genome scaffolds. *G3 (Bethesda)* 5: 2007–2019.
- Hermida M, Rodriguez-Ramilo ST, Hachero-Cruzado I, Herrera M, Sciara AA et al., 2014. First genetic linkage map for comparative mapping and QTL screening of brill *Scophthalmus rhombus*. *Aquaculture* 420: S111–S120.
- Hollenbeck CM, Portnoy DS, Gold JR, 2015. A genetic linkage map of red drum *Sciaenops ocellatus* and comparison of chromosomal synteny with four other fish species. *Aquaculture* 435: 265–274.
- Hubert S, Higgins B, Borza T, Bowman S, 2010. Development of a SNP resource and a genetic linkage map for Atlantic cod *Gadus morhua*. *BMC Genomics* 11: 191.
- Jones DB, Jerry DR, Khatkar MS, Raadsma HW, Zenger KR, 2013. A high-density SNP genetic linkage map for the silver-lipped pearl oyster *Pinctada maxima*: a valuable resource for gene localisation and marker-assisted selection. *BMC Genomics* 14: 810.

- Kai W, Kikuchi K, Fujita M, Suetake H, Fujiwara A et al., 2005. Genetic linkage map for the tiger pufferfish *Takifugu rubripes*. *Genetics* 171: 227–238.
- Kai W, Nomura K, Fujiwara A, Nakamura Y, Yasuie M et al., 2014. A ddRAD-based genetic map and its integration with the genome assembly of Japanese eel *Anguilla japonica* provides insights into genome evolution after the teleost-specific genome duplication. *BMC Genomics* 15: 233.
- Kessuwan K, Kubota S, Liu Q, Sano M, Okamoto N et al., 2015. Detection of growth-related quantitative trait loci and high-resolution genetic linkage map using simple sequence repeat markers in the kelp grouper *Epinephelus bruneus*. *Mar. Biotechnol.* 18: 57–84.
- Lallias D, Beaumont AR, Haley CS, Boudry P, Heurtebise S et al., 2007a. A first-generation genetic linkage map of the European flat oyster *Ostrea edulis* (L.) based on AFLP and microsatellite markers. *Anim. Genet.* 38: 560–568.
- Lallias D, Lapegue S, Hecquet C, Boudry P, Beaumont AR, 2007b. AFLP-based genetic linkage maps of the blue mussel *Mytilus edulis*. *Anim. Genet.* 38: 340–349.
- Li L, Guo XM, 2004. AFLP-based genetic linkage maps of the Pacific oyster *Crassostrea gigas* Thunberg. *Mar. Biotechnol.* 6: 26–36.
- Li Y, He M, 2014. Genetic mapping and QTL analysis of growth-related traits in *Pinctada fucata* using restriction-site associated DNA sequencing. *PLoS ONE* 9: e111707.
- Li Y, Liu SK, Qin ZK, Waldbieser G, Wang RJ et al., 2015. Construction of a high-density, high-resolution genetic map and its integration with BAC-based physical map in channel catfish. *DNA Res.* 22: 39–52.
- Liao XL, Ma HY, Xu GB, Shao CW, Tian YS et al., 2009. Construction of a genetic linkage map and mapping of a female-specific DNA marker in half-smooth tongue sole *Cynoglossus semilaevis*. *Mar. Biotechnol.* 11: 699–709.
- Liu S, Rexroad CE III, Couch CR, Cordes JF, Reece KS et al., 2012a. A microsatellite linkage map of striped bass *Morone saxatilis* reveals conserved synteny with the three-spined stickleback *Gasterosteus aculeatus*. *Mar. Biotechnol.* 14: 237–244.
- Liu L, Li J, Liu P, Zhao F, Gao B et al., 2012b. A genetic linkage map of swimming crab *Portunus trituberculatus* based on SSR and AFLP markers. *Aquaculture* 344: 66–81.
- Liu Q, Sakamoto T, Kubota S, Okamoto N, Yamashita H et al., 2013. A genetic linkage map of kelp grouper *Epinephelus bruneus* based on microsatellite markers. *Aquaculture* 414: 63–81.
- Liu ZJ, Karsi A, Li P, Cao D, Dunham R, 2003. An AFLP-based genetic linkage map of channel catfish *Ictalurus punctatus* constructed by using an interspecific hybrid resource family. *Genetics* 165: 687–694.
- Liu XD, Liu X, Guo X, Gao QK, Zhao HG et al., 2006. A preliminary genetic linkage map of the pacific abalone *Haliotis discus hannai* Ino. *Mar. Biotechnol.* 8: 386–397.
- Naruse K, Fukamachi S, Mitani H, Kondo M, Matsuoka T et al., 2000. A detailed linkage map of medaka *Oryzias latipes*: comparative genomics and genome evolution. *Genetics* 154: 1773–1784.
- Ning Y, Liu X, Wang ZY, Guo W, Li Y et al., 2007. A genetic map of large yellow croaker *Pseudosciaena crocea*. *Aquaculture* 264: 16–26.
- Nomura K, Ozaki A, Morishima K, Yoshikawa Y, Tanaka H et al., 2011. A genetic linkage map of the Japanese eel *Anguilla japonica* based on AFLP and microsatellite markers. *Aquaculture* 310:329–342.
- Nossa CW, Havlak P, Yue J-X, Lv J, Vincent KY et al., 2014. Joint assembly and genetic mapping of the Atlantic horseshoe crab genome reveals ancient whole genome duplication. *GigaScience* 3: 9.
- Palaiokostas C, Bekaert M, Taggart JB, Gharbi K, McAndrew BJ et al., 2015. A new SNP-based vision of the genetics of sex determination in European sea bass *Dicentrarchus labrax*. *Gen. Sel. Evol.* 47: 68.
- Qin Y, Liu X, Zhang H, Zhang G, Guo X, 2007. Genetic mapping of size-related quantitative trait loci (QTL) in the bay scallop *Argopecten irradians* using AFLP and microsatellite markers. *Aquaculture* 272: 281–90.

- Peichel CL, Nereng KS, Ohgi KA, Cole BLE, Colosimo PF et al., 2001. The genetic architecture of divergence between threespine stickleback species. *Nature* 414: 901–905.
- Petersen JL, Baerwald MR, Ibarra AM, May B, 2012. A first-generation linkage map of the Pacific lion-paw scallop *Nodipecten subnodosus*: initial evidence of QTL for size traits and markers linked to orange shell color. *Aquaculture* 350: 200–209.
- Plough LV, Shin G, Hedgecock D, 2016. Genetic inviability is a major driver of type-III survivorship in experimental families of a highly fecund marine bivalve. *Mol Ecol*. 25: 895–910.
- Portnoy DS, Renshaw MA, Hollenbeck CM, Gold JR, 2010. A genetic linkage map of red drum *Sciaenops ocellatus*. *Anim. Genet.* 41: 630–641
- Reid DP, Smith CA, Rommens M, Blanchard B, Martin-Robichaud D et al., 2007. A genetic linkage map of Atlantic halibut (*Hippoglossus hippoglossus* L.). *Genetics* 177: 1193–1205.
- Shi Y, Kui H, Guo X, Gu Z, Wang Y et al., 2009. Genetic linkage map of the pearl oyster *Pinctada martensii* (Dunker). *Aqua. Res* 41: 35–44.
- Song W, Li Y, Zhao Y, Liu Y, Niu Y et al., 2012a. Construction of a high-density microsatellite genetic linkage map and mapping of sexual and growth-related traits in half-smooth tongue sole *Cynoglossus semilaevis*. *PLoS ONE* 7: e52097.
- Song W, Pang R, Niu Y, Gao F, Zhao Y et al., 2012b. Construction of high-density genetic linkage maps and mapping of growth-related quantitative trait loci in the Japanese flounder *Paralichthys olivaceus*. *PLoS ONE* 7: e50404.
- Staelens J, Rombaut D, Vercauteren I, Argue B, Benzie J et al., 2008. High-density linkage maps and sex-linked markers for the black tiger shrimp *Penaeus monodon*. *Genetics* 179: 917–925.
- Tian M, Li Y, Jing J, Mu C, Du H et al., 2015. Construction of a high-density genetic Map and quantitative trait locus mapping in the sea cucumber *Apostichopus japonicus*. *Sci. Rep.* 5: 14852.
- Tsigenopoulos CS, Louro B, Chatziplis D, Lagnel J, Vogiatzi E et al., 2014. Second generation genetic linkage map for the gilthead sea bream *Sparus aurata* L. *Mar. Genomics* 18 (Pt A): 77–82.
- Wang S, Bao Z, Pan P, Zhang Q, 2003. AFLP linkage map of an intraspecific cross in *Chlamys farreri*. *J. Shellfish Res.* 23: 491–499.
- Wang LL, Song LS, Chang Y, Xu W, Ni D et al., 2005. A preliminary genetic map of Zhikong scallop (*Chlamys farreri* Jones et Preston 1904). *Aqua. Res.* 36: 643–653.
- Wang L, Song L, Zhang H, Gao Q, Guo X, 2007a. Genetic linkage map of bay scallop *Argopecten irradians irradians* (Lamarck 1819). *Aquacult. Res.* 38: 409–19.
- Wang CM, Zhu ZY, Lo LC, Feng F, Lin G et al., 2007b. A microsatellite linkage map of Barramundi *Lates calcarifer*. *Genetics* 175: 907–915.
- Wang W-J, Wang H-P, Yao H, Wallat GK, Tiu LG et al., 2010. A first genetic linkage map of bluegill sunfish *Lepomis macrochirus* using AFLP markers. *Aquacult. Int.* 18:825–835.
- Wang Y, Li L, Zhang S-D, Zheng H-P, Zhang G, 2012. Microsatellite segregation distortion analysis of the out bred, inbred and selfed families of the bay scallop *Argopecten irradians*. *Marine Sciences (Beijing)* 36: 109–115.
- Wang L, Wan ZY, Bai B, Huang SQ, Chua E et al., 2015a. Construction of a high-density linkage map and fine mapping of QTL for growth in Asian seabass. *Sci. Rep.* 5:16358.
- Wang W, Hu Y, Ma Y, Xu L, Guan J et al., 2015b. High-density genetic linkage mapping in turbot (*Scophthalmus maximus* L.) based on SNP markers and major sex- and growth-related regions detection. *PLoS ONE* 10: e0120410.
- Xiao S, Wang P, Zhang Y, Fang L, Liu Y et al., 2015. Gene map of large yellow croaker *Larimichthys crocea* provides insights into teleost genome evolution and conserved regions associated with growth. *Sci. Rep.* 5: 18661.
- Xu K, Li Q, Kong L, Yu R, 2008. A first-generation genetic map of the Japanese scallop *Patinopecten yessoensis*-based AFLP and microsatellite markers. *Aqua. Res.* 40: 35–43.
- Yan J, Jing J, Mu X, Du H, Tian M et al., 2013. A genetic linkage map of the sea cucumber *Apostichopus japonicus* based on microsatellites and SNPs. *Aquaculture* 404: 1–7.



- You EM, Liu KF, Huang SW, Chen M, Groumellec ML et al., 2010. Construction of integrated genetic linkage maps of the tiger shrimp *Penaeus monodon* using microsatellite and AFLP markers. *Anim. Genet.* 41: 365–376.
- You X, Shu L, Li S, Chen J, Luo J et al., 2013 Construction of high-density genetic linkage maps for orange-spotted grouper *Epinephelus coioides* using multiplexed shotgun genotyping. *BMC Genet.* 14: 113.
- Yu ZN, Guo XM, 2003. Genetic linkage map of the eastern oyster *Crassostrea virginica* Gmelin. *Biol. Bull.* 204: 327–338.
- Yuan T, He M, Huang L, Hu J, 2010. Genetic linkage maps of the noble scallop *Chlamys nobilis* (reeve) based on AFLP and microsatellite markers. *J. Shellfish Res.* 29: 55–62.
- Zhan A, Hu J, Hu X, Hui M, Wang M et al., 2009. Construction of microsatellite-based linkage maps and identification of size-related quantitative trait loci for Zhikong scallop *Chlamys farreri*. *Anim. Genet.* 40: 821–831.
- Zhang L, Yang C, Zhang Y, Li L, Zhang X et al., 2007. A genetic linkage map of Pacific white shrimp *Litopenaeus vannamei*: sex-linked microsatellite markers and high recombination rates. *Genetica* 131: 37–49.
